# Supplementary material
Source: publisher figshare collection journal article supplement (https://tandf.figshare.com/ndownloader/files/20502291)
Supplement: Supplementary file 1 [file 20502291]

**Appendix**

Table A1 Impacts of climate-related disasters on employment

|  | Drought | Flooding | Heat | Hurricane/  tropic storm | Severe Storm/  thunder storm | Tornado | Wildfire | Winter Weather |
| --- | --- | --- | --- | --- | --- | --- | --- | --- |
| *Dit* | -0.0069 | -0.0012 | 0.0005 | 0.003 | -0.0022** | -0.0011 | 0.0097*** | 0.001 |
|  | (0.0042) | (0.0011) | (0.0028) | (0.0042) | (0.0011) | (0.0012) | (0.0037) | (0.0016) |
| *Pit* | 0.0031 | 0.0027** | 0.0103*** | -0.0107*** | -0.0003 | -0.0040*** | 0.0178*** | 0.0058*** |
|  | (0.0026) | (0.0013) | (0.0018) | (0.0027) | (0.0020) | (0.0011) | (0.0024) | (0.0016) |
| *VDit* | 0.0069 | -0.0086*** | 0.0170*** | 0.0154** | -0.0054** | -0.0013 | 0.0191*** | -0.0024 |
|  | (0.0057) | (0.0022) | (0.0046) | (0.0060) | (0.0023) | (0.0028) | (0.0066) | (0.0025) |
| *VPit* | -0.0014 | -0.0050* | 0.0045 | 0.0038 | -0.0191*** | 0.0005 | 0.0291*** | -0.0085*** |
|  | (0.0035) | (0.0026) | (0.0028) | (0.0040) | (0.0040) | (0.0024) | (0.0041) | (0.0026) |
| *tmean* | 0.0036 | 0.0027 | 0.0039 | 0.0036 | 0.0034 | 0.0033 | 0.0039 | 0.0035 |
|  | (0.0035) | (0.0035) | (0.0035) | (0.0035) | (0.0035) | (0.0035) | (0.0035) | (0.0035) |
| *precipitation* | 0.0003 | 0.0011 | 0.0004 | 0.0002 | 0.0006 | 0.0003 | 0.0014 | 0.0003 |
|  | (0.0020) | (0.0020) | (0.0020) | (0.0020) | (0.0020) | (0.0020) | (0.0020) | (0.0020) |
| *Sqr tmean* | 0.0000 | 0.0001 | 0.0000 | 0.0000 | 0.0000 | 0.0000 | 0.0000 | 0.0000 |
|  | (0.0001) | (0.0001) | (0.0001) | (0.0001) | (0.0001) | (0.0001) | (0.0001) | (0.0001) |
| *Sqr_precipitation* | -0.0001* | -0.0002** | -0.0001* | -0.0001* | -0.0002* | -0.0001* | -0.0002** | -0.0001* |
|  | (0.0001) | (0.0001) | (0.0001) | (0.0001) | (0.0001) | (0.0001) | (0.0001) | (0.0001) |
| *lpopden* | 0.0007*** | 0.0007*** | 0.0007*** | 0.0007*** | 0.0007*** | 0.0007*** | 0.0007*** | 0.0007*** |
|  | (0.000) | (0.000) | (0.000) | (0.000) | (0.000) | (0.000) | (0.000) | (0.000) |
| *lpwhite* | 0.1465*** | 0.1454*** | 0.1522*** | 0.1460*** | 0.1492*** | 0.1451*** | 0.1524*** | 0.1461*** |
|  | (0.0236) | (0.0236) | (0.0236) | (0.0236) | (0.0236) | (0.0236) | (0.0236) | (0.0236) |
| *lpmale* | -0.4564*** | -0.4585*** | -0.4484*** | -0.4564*** | -0.4605*** | -0.4564*** | -0.4623*** | -0.4568*** |
|  | (0.0619) | (0.0619) | (0.0618) | (0.0618) | (0.0618) | (0.0619) | (0.0618) | (0.0619) |
| *lpa65o* | -0.4557*** | -0.4589*** | -0.4556*** | -0.4559*** | -0.4534*** | -0.4566*** | -0.4785*** | -0.4540*** |
|  | (0.0570) | (0.0570) | (0.0569) | (0.0570) | (0.0569) | (0.0569) | (0.0569) | (0.0569) |
| *lrespn* | 0.0346*** | 0.0337*** | 0.0337*** | 0.0343*** | 0.0341*** | 0.0339*** | 0.0286** | 0.0348*** |
|  | (0.0116) | (0.0116) | (0.0116) | (0.0116) | (0.0116) | (0.0116) | (0.0116) | (0.0116) |
| *lassn* | 0.0916*** | 0.0916*** | 0.0923*** | 0.0914*** | 0.0917*** | 0.0918*** | 0.0909*** | 0.0920*** |
|  | (0.0054) | (0.0054) | (0.0054) | (0.0054) | (0.0054) | (0.0054) | (0.0054) | (0.0054) |
| *lpvote* | -0.3239*** | -0.3253*** | -0.3235*** | -0.3218*** | -0.3235*** | -0.3248*** | -0.3258*** | -0.3258*** |
|  | (0.0121) | (0.0120) | (0.0120) | (0.0121) | (0.0120) | (0.0121) | (0.0120) | (0.0121) |
| *ledu* | 1.4670*** | 1.4661*** | 1.4696*** | 1.4655*** | 1.4638*** | 1.4661*** | 1.4615*** | 1.4644*** |
|  | (0.0297) | (0.0297) | (0.0297) | (0.0297) | (0.0297) | (0.0297) | (0.0297) | (0.0297) |
| *N* | 60,000 | 60,000 | 60,000 | 60,000 | 60,000 | 60,000 | 60,000 | 60,000 |
| *Chi square* | 9,840.91 | 9,880.39 | 9,928.79 | 9,881.04 | 9,893.43 | 9,859.12 | 10,075.83 | 9,859.42 |
| *P value* | 0.00 | 0.00 | 0.00 | 0.00 | 0.00 | 0.00 | 0.00 | 0.00 |
| *Wald test for spatial term* | 12,546.46 | 12,510.67 | 12,487.07 | 12,486.53 | 12,493.26 | 12,512.06 | 12,139.50 | 12,551.49 |
| *P value* | 0.00 | 0.00 | 0.00 | 0.00 | 0.00 | 0.00 | 0.00 | 0.00 |

Note: Robust standard errors in parentheses; * p<0.10, ** p<0.05, *** p<0.01; N is number of observations.

Table A2 Impacts of climate-related disasters on wage

|  | Drought | Flooding | Heat | Hurricane/  tropic storm | Severe Storm/  thunder storm | Tornado | Wildfire | Winter Weather |
| --- | --- | --- | --- | --- | --- | --- | --- | --- |
| *D* | -0.0114** | -0.0006 | 0.0006 | 0.0017 | -0.0039*** | -0.0018 | 0.0009 | 0.0013 |
|  | (0.005) | (0.001) | (0.003) | (0.005) | (0.001) | (0.001) | (0.004) | (0.002) |
| *P* | -0.0014 | 0.0054*** | 0.0069*** | -0.0083*** | -0.0019 | -0.0061*** | 0.0118*** | 0.0002 |
|  | (0.003) | (0.002) | (0.002) | (0.003) | (0.002) | (0.001) | (0.003) | (0.002) |
| *VDit* | 0.0115* | -0.0091*** | 0.0074 | 0.0110* | -0.0091*** | -0.0086*** | 0.0089 | -0.0049* |
|  | (0.006) | (0.002) | (0.005) | (0.006) | (0.002) | (0.003) | (0.007) | (0.003) |
| *VPit* | 0.0083** | -0.0069** | 0.0101*** | -0.0096** | -0.0086** | -0.0154*** | 0.0185*** | -0.0052* |
|  | (0.004) | (0.003) | (0.003) | (0.004) | (0.004) | (0.003) | (0.004) | (0.003) |
| *tmean* | 0.0141*** | 0.0126*** | 0.0139*** | 0.0136*** | 0.0134*** | 0.0129*** | 0.0135*** | 0.0132*** |
|  | (0.004) | (0.003) | (0.003) | (0.003) | (0.003) | (0.003) | (0.003) | (0.003) |
| *precipitation* | 0.0017 | 0.0026 | 0.0018 | 0.0015 | 0.0022 | 0.0016 | 0.0023 | 0.0017 |
|  | (0.002) | (0.002) | (0.002) | (0.002) | (0.002) | (0.002) | (0.002) | (0.002) |
| *Sqr tmean* | -0.0005*** | -0.0004*** | -0.0005*** | -0.0005*** | -0.0004*** | -0.0004*** | -0.0004*** | -0.0004*** |
|  | (0.000) | (0.000) | (0.000) | (0.000) | (0.000) | (0.000) | (0.000) | (0.000) |
| *Sqr_precipitation* | -0.0001* | -0.0001* | -0.0001* | -0.0001* | -0.0001* | -0.0001 | -0.0001* | -0.0001* |
|  | (0.000) | (0.000) | (0.000) | (0.000) | (0.000) | (0.000) | (0.000) | (0.000) |
| *lpopden* | 0.0000* | 0.0000* | 0.0000* | 0.0000* | 0.0000* | 0.0000* | 0.0000* | 0.0000* |
|  | (0.0000) | (0.0000) | (0.0000) | (0.0000) | (0.0000) | (0.0000) | (0.0000) | (0.0000) |
| *lpwhite* | 0.2681*** | 0.2659*** | 0.2708*** | 0.2676*** | 0.2705*** | 0.2687*** | 0.2699*** | 0.2679*** |
|  | (0.026) | (0.026) | (0.026) | (0.026) | (0.026) | (0.026) | (0.026) | (0.026) |
| *lpmale* | -0.1137* | -0.1184* | -0.1039 | -0.1182* | -0.1205* | -0.1273* | -0.1173* | -0.1206* |
|  | (0.068) | (0.068) | (0.068) | (0.068) | (0.068) | (0.068) | (0.068) | (0.068) |
| *lpa65o* | -0.3383*** | -0.3477*** | -0.3390*** | -0.3510*** | -0.3359*** | -0.3376*** | -0.3576*** | -0.3441*** |
|  | (0.062) | (0.062) | (0.062) | (0.062) | (0.062) | (0.062) | (0.062) | (0.062) |
| *lrespn* | -0.2414*** | -0.2433*** | -0.2428*** | -0.2442*** | -0.2422*** | -0.2455*** | -0.2458*** | -0.2418*** |
|  | (0.013) | (0.013) | (0.013) | (0.013) | (0.013) | (0.013) | (0.013) | (0.013) |
| *lassn* | -0.0467*** | -0.0463*** | -0.0460*** | -0.0465*** | -0.0465*** | -0.0460*** | -0.0467*** | -0.0466*** |
|  | (0.006) | (0.006) | (0.006) | (0.006) | (0.006) | (0.006) | (0.006) | (0.006) |
| *lpvote* | -0.3082*** | -0.3117*** | -0.3087*** | -0.3086*** | -0.3102*** | -0.3118*** | -0.3111*** | -0.3114*** |
|  | (0.013) | (0.013) | (0.013) | (0.013) | (0.013) | (0.013) | (0.013) | (0.013) |
| *ledu* | 0.5514*** | 0.5506*** | 0.5560*** | 0.5467*** | 0.5480*** | 0.5450*** | 0.5516*** | 0.5480*** |
|  | (0.032) | (0.032) | (0.032) | (0.032) | (0.032) | (0.032) | (0.032) | (0.032) |
| *N* | 60,000 | 60,000 | 60,000 | 60,000 | 60,000 | 60,000 | 60,000 | 60,000 |
| *Chi square* | 5,646.80 | 5,685.41 | 5,705.36 | 5,701.12 | 5,693.76 | 5,761.97 | 5,729.06 | 5,652.89 |
| *P value* | 0.00 | 0.00 | 0.00 | 0.00 | 0.00 | 0.00 | 0.00 | 0.00 |
| *Wald test for spatial term* | 7,691.37 | 7,681.81 | 7,646.84 | 7,609.66 | 7,638.30 | 7,593.88 | 7,573.62 | 7,658.14 |
| *P value* | 0.00 | 0.00 | 0.00 | 0.00 | 0.00 | 0.00 | 0.00 | 0.00 |

Note: Standard errors in parentheses; * p<0.10, ** p<0.05, *** p<0.01; N is number of observations.
